# Supplementary material
Source: PubMed Central journal article supplement (PMC4564678)
Supplement: mmc1.pdf [file mmc1.pdf]

# An Analysis of Biomolecular Force Fields for Simulations of Polyglutamine in Solution (Supplementary Information)

Aaron M. Fluitt<sup>1</sup> and Juan J. de Pablo<sup>1,2,\*</sup>

<sup>1</sup>Institute for Molecular Engineering, University of Chicago, Chicago, Illinois, United States, <sup>2</sup>Argonne National Laboratory, Lemont, Illinois, United States

## Abstract

This document contains supplementary material.

Last updated: July 13, 2015

\*Corresponding author. Electronic address: depablo@uchicago.edu.

## SIMULATION DETAILS

| Force field(s)                  | Replica temperatures (K)                                                                                                                                                                                                                                                                                                                                                                                                                                                                                                                                                                       |
|---------------------------------|------------------------------------------------------------------------------------------------------------------------------------------------------------------------------------------------------------------------------------------------------------------------------------------------------------------------------------------------------------------------------------------------------------------------------------------------------------------------------------------------------------------------------------------------------------------------------------------------|
| AMBER ff99                      | 298.00; 300.31; 302.63; 304.96; 307.31; 309.67; 312.05; 314.43; 316.84; 319.25; 321.68; 324.12; 326.58; 329.05; 331.54; 333.79; 336.30; 338.82; 341.37; 343.92; 346.49; 349.08; 351.68; 354.30; 356.93; 359.58; 362.24; 364.91; 367.61; 370.31; 373.04; 375.78; 378.54; 381.31; 384.09; 386.90; 389.72; 392.56; 395.41; 398.28; 401.17; 404.08; 406.99; 409.93; 412.89; 415.86; 418.85; 421.86; 424.89; 427.93; 430.96; 434.04; 437.14; 440.26; 443.39; 446.55; 449.71; 452.90; 456.11; 459.34                                                                                                 |
| GROMOS96 53a6,<br>GROMOS96 54a7 | 298.00; 299.88; 301.77; 303.67; 305.58; 307.50; 309.43; 311.40; 313.35; 315.30; 317.27; 319.25; 321.24; 323.23; 325.24; 327.26; 329.29; 331.33; 333.38; 335.44; 337.50; 339.58; 341.68; 343.78; 345.89; 348.02; 350.15; 352.30; 354.44; 356.60; 358.78; 360.97; 363.17; 365.38; 367.61; 369.85; 372.10; 374.35; 376.62; 378.90; 381.19; 383.50; 385.81; 388.13; 390.47; 392.83; 395.19; 397.57; 399.96; 402.36; 404.77; 407.20; 409.66; 412.11; 414.58; 417.05; 419.55; 422.05; 424.56; 427.09; 429.63; 432.18; 434.74; 437.32; 439.92; 442.52; 445.14; 447.78; 450.43; 453.09; 455.76; 458.58 |
| All others                      | 298.00; 300.08; 302.17; 304.28; 306.39; 308.52; 310.66; 312.81; 314.97; 317.14; 319.33; 321.52; 323.73; 325.96; 328.19; 330.43; 332.70; 334.97; 337.25; 339.54; 341.85; 344.18; 346.51; 348.86; 351.21; 353.58; 355.97; 358.36; 360.77; 363.20; 365.63; 368.09; 370.55; 373.03; 375.53; 378.04; 380.56; 383.09; 385.64; 388.20; 390.78; 393.37; 395.97; 398.59; 401.22; 403.87; 406.53; 409.21; 411.90; 414.61; 417.33; 420.07; 422.82; 425.59; 428.37; 431.17; 433.98; 436.81; 439.66; 442.52; 445.39; 448.29; 451.20; 454.12; 457.06; 460.02; 463.00; 465.99; 469.00; 472.02; 475.06; 478.12 |

Table S1: Replica temperatures in REMD simulation.

## ESTIMATES OF SAMPLING ERROR

Estimates of the sampling error, where provided, were calculated by a block averaging approach. Each production MD simulation was 100 ns in length. For a given quantity (e.g.  $R_g$ ), block averages of the quantity were computed over the first and

second 50-ns halves of the simulation. The mean absolute deviation of the two block averages with respect to the total average was taken as the sampling error.

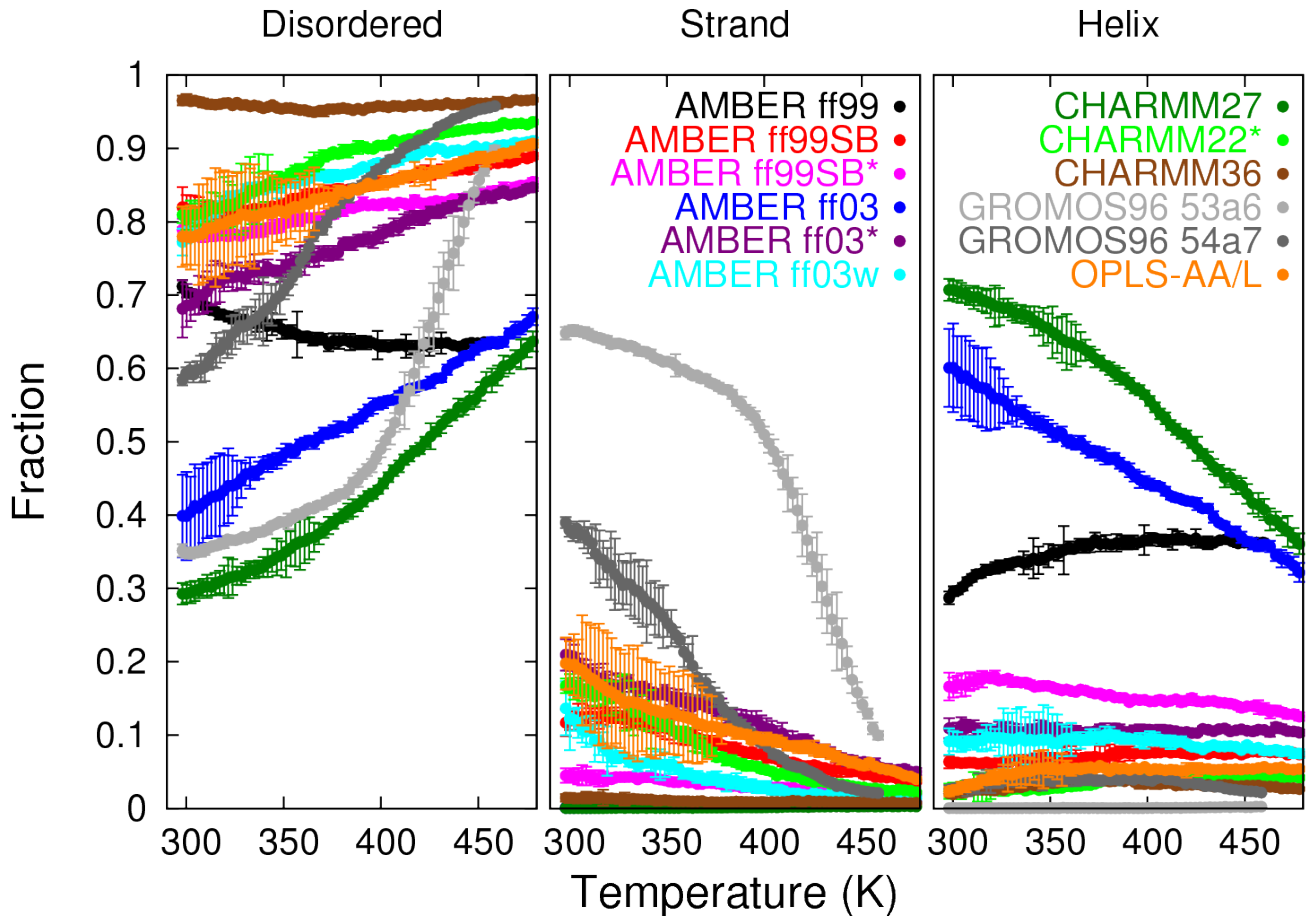

Figure S1: Average fractional secondary structure of Q<sub>30</sub> in water. Left to right, the disordered ( $f_d$ ), strand-like ( $f_s$ ), and helix-like ( $f_h$ ) fractions are plotted for all temperatures.

| Force field   | $f_d$             | $f_s$             | $f_h$             |
|---------------|-------------------|-------------------|-------------------|
| AMBER ff99    | $0.712 \pm 0.009$ | $0.001 \pm 0.000$ | $0.287 \pm 0.009$ |
| AMBER ff99SB  | $0.820 \pm 0.028$ | $0.117 \pm 0.019$ | $0.063 \pm 0.009$ |
| AMBER ff99SB* | $0.789 \pm 0.015$ | $0.045 \pm 0.010$ | $0.166 \pm 0.019$ |
| AMBER ff03    | $0.399 \pm 0.056$ | $0.000 \pm 0.000$ | $0.601 \pm 0.053$ |
| AMBER ff03*   | $0.681 \pm 0.039$ | $0.209 \pm 0.021$ | $0.109 \pm 0.014$ |
| AMBER ff03w   | $0.772 \pm 0.018$ | $0.136 \pm 0.037$ | $0.091 \pm 0.018$ |
| CHARMM27      | $0.293 \pm 0.015$ | $0.000 \pm 0.000$ | $0.707 \pm 0.015$ |
| CHARMM22*     | $0.809 \pm 0.011$ | $0.167 \pm 0.010$ | $0.023 \pm 0.010$ |
| CHARMM36      | $0.965 \pm 0.007$ | $0.014 \pm 0.005$ | $0.020 \pm 0.003$ |
| GROMOS96 53a6 | $0.352 \pm 0.008$ | $0.648 \pm 0.008$ | $0.000 \pm 0.000$ |
| GROMOS96 54a7 | $0.584 \pm 0.007$ | $0.390 \pm 0.007$ | $0.026 \pm 0.005$ |
| OPLS-AA/L     | $0.780 \pm 0.041$ | $0.198 \pm 0.035$ | $0.023 \pm 0.006$ |

Table S2: Fractional secondary structure of Q<sub>30</sub> in water at 298 K.

| Force field   | Temperature (K) | $f_d$         | $f_s$         | $f_h$         |
|---------------|-----------------|---------------|---------------|---------------|
| AMBER ff99    | 459             | 0.634 ± 0.005 | 0.003 ± 0.001 | 0.363 ± 0.005 |
| AMBER ff99SB  | 478             | 0.890 ± 0.004 | 0.037 ± 0.023 | 0.073 ± 0.004 |
| AMBER ff99SB* | 478             | 0.854 ± 0.005 | 0.020 ± 0.003 | 0.125 ± 0.006 |
| AMBER ff03    | 478             | 0.670 ± 0.011 | 0.000 ± 0.000 | 0.322 ± 0.013 |
| AMBER ff03*   | 478             | 0.847 ± 0.005 | 0.050 ± 0.005 | 0.103 ± 0.004 |
| AMBER ff03w   | 478             | 0.910 ± 0.005 | 0.015 ± 0.003 | 0.075 ± 0.006 |
| CHARMM27      | 478             | 0.637 ± 0.014 | 0.002 ± 0.000 | 0.361 ± 0.014 |
| CHARMM22*     | 478             | 0.936 ± 0.013 | 0.022 ± 0.002 | 0.042 ± 0.003 |
| CHARMM36      | 478             | 0.966 ± 0.002 | 0.007 ± 0.001 | 0.026 ± 0.002 |
| GROMOS96 53a6 | 459             | 0.898 ± 0.006 | 0.010 ± 0.006 | 0.002 ± 0.001 |
| GROMOS96 54a7 | 459             | 0.958 ± 0.002 | 0.021 ± 0.002 | 0.021 ± 0.002 |
| OPLS-AA/L     | 478             | 0.906 ± 0.005 | 0.040 ± 0.003 | 0.054 ± 0.003 |

Table S3: Fractional secondary structure of Q<sub>30</sub> in water at elevated temperatures.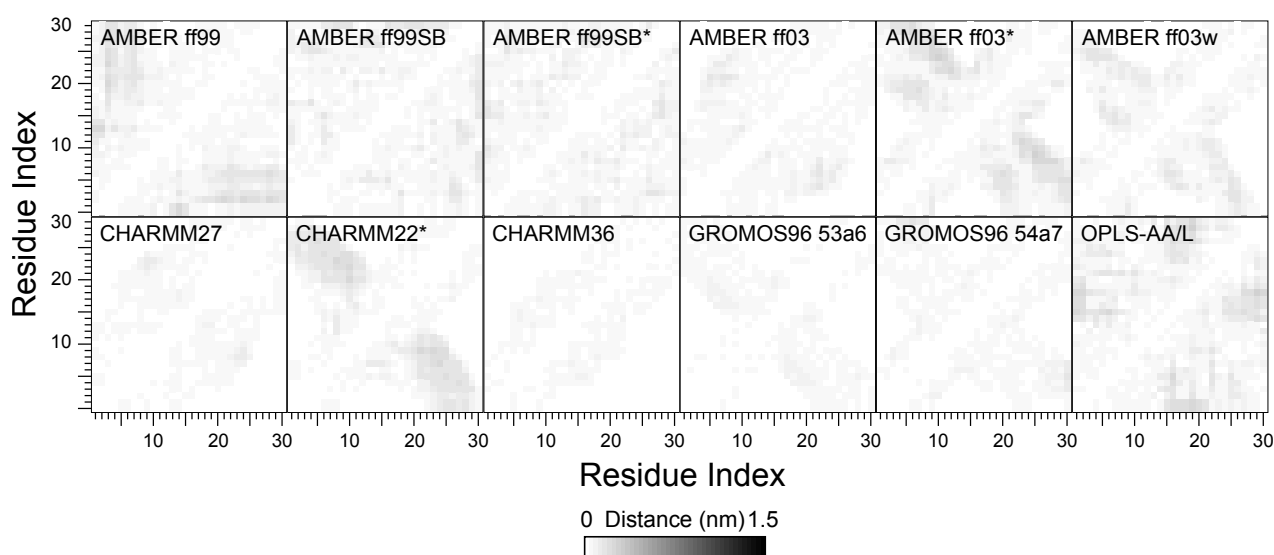Figure S2: Sampling error in residue contact maps for Q<sub>30</sub> in water at 298 K.

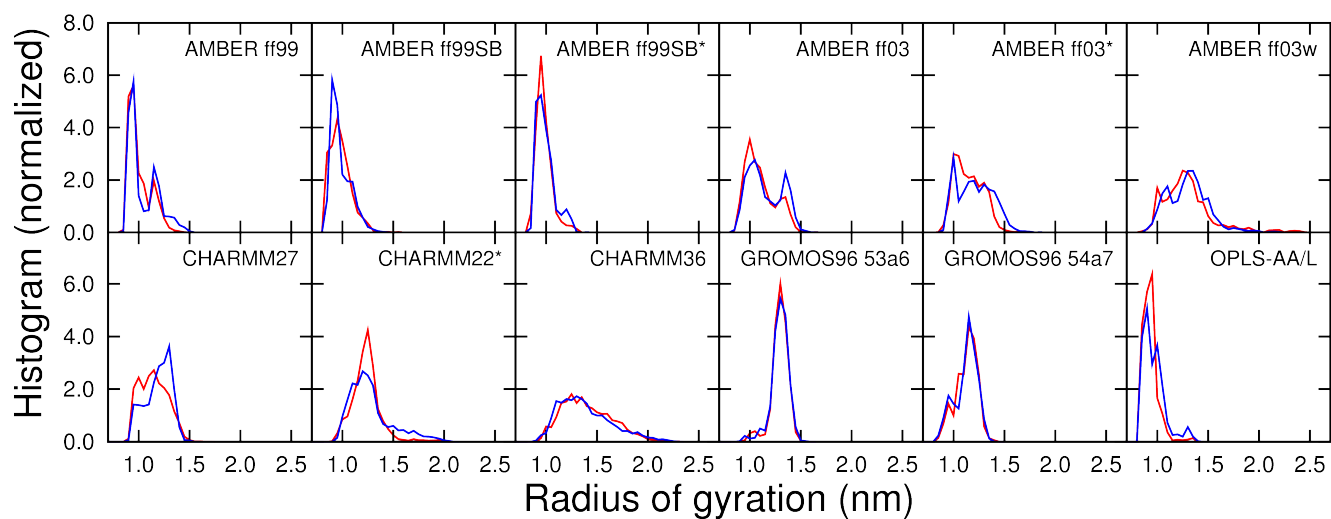

Figure S3: Block histograms of radius of gyration of  $Q_{30}$  in water at 298 K: first 50 ns (red), last 50 ns (blue).

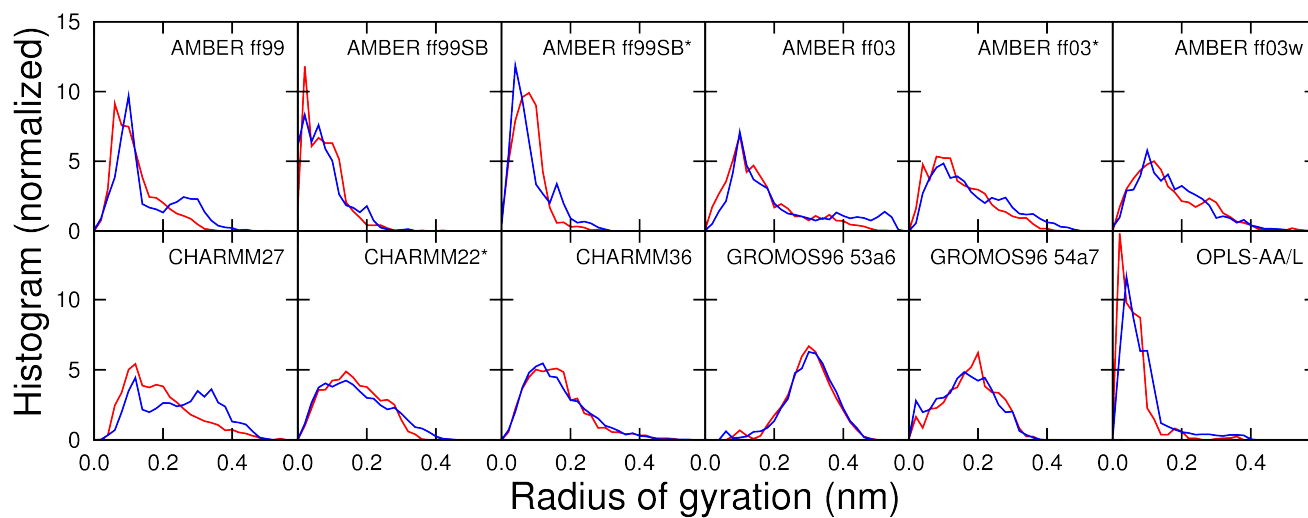

Figure S4: Block histograms of asphericity of  $Q_{30}$  in water at 298 K: first 50 ns (red), last 50 ns (blue).

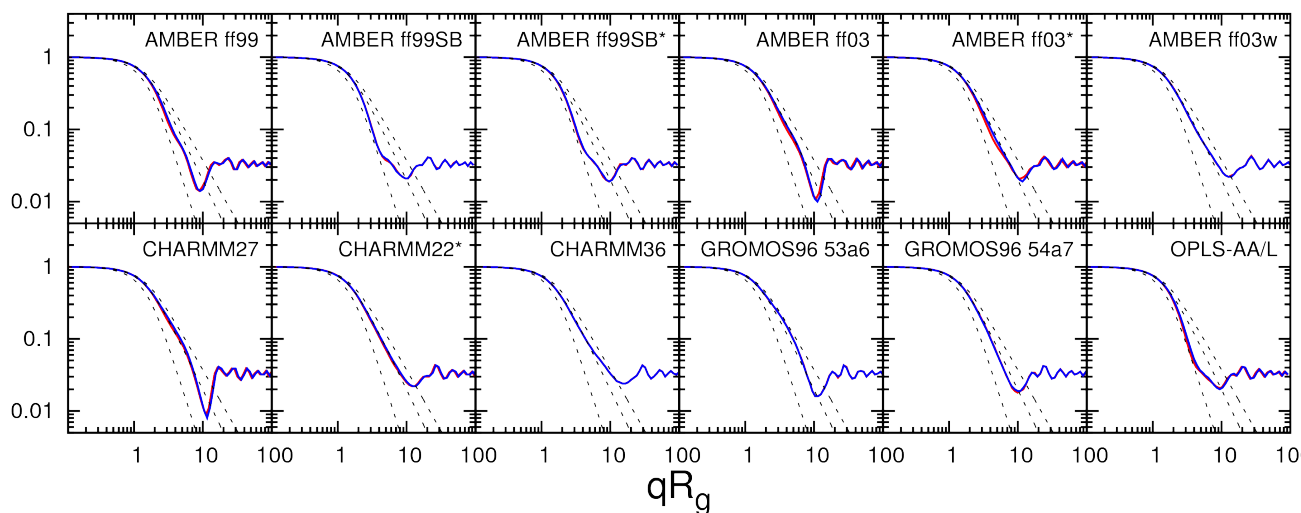

Figure S5: Single chain form factor of  $Q_{30}$  in water at 298 K: first 50 ns (red), last 50 ns (blue). Dashed lines indicate analytical predictions for (left to right)  $\nu = 1/3$ ,  $\nu = 1/2$ ,  $\nu = 0.588$ .

| Force field   | $\langle \tau \rangle$ (ns) |
|---------------|-----------------------------|
| AMBER ff99    | 3.0                         |
| AMBER ff99SB  | 3.6                         |
| AMBER ff99SB* | 3.3                         |
| AMBER ff03    | 5.5                         |
| AMBER ff03*   | 3.5                         |
| AMBER ff03w   | 0.9                         |
| CHARMM27      | 8.7                         |
| CHARMM22*     | 2.4                         |
| CHARMM36      | 1.5                         |
| GROMOS96 53a6 | 1.4                         |
| GROMOS96 54a7 | 5.7                         |
| OPLS-AA/L     | 2.2                         |

Table S4: Conformational relaxation time of  $Q_{30}$  in water. In each set of simulations, the trajectories were unmixed (i.e., the configurational swaps were undone). For each unmixed trajectory, we calculated the structural RMSD autocorrelation function (RMSD calculation over all atoms of  $Q_{30}$  and with respect to the initial configurations for production simulations) and fit it to a function of the form  $y = \exp(-x/\tau)$ . The values in the table are averaged over all replicas for each force field.

## SUPERHEATING OF WATER

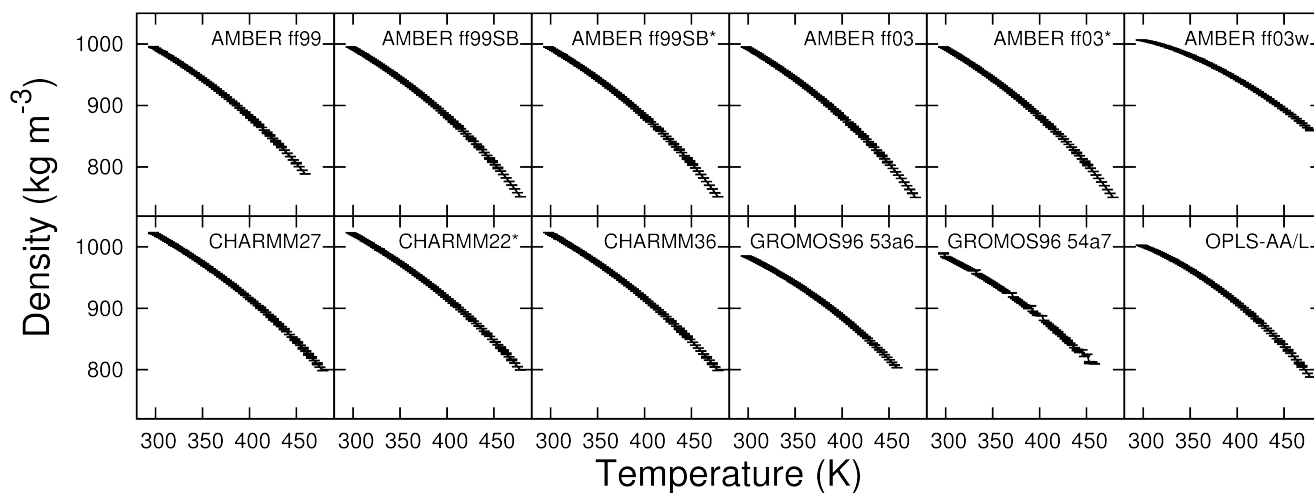

Figure S6: Average density of the system as a function of temperature.

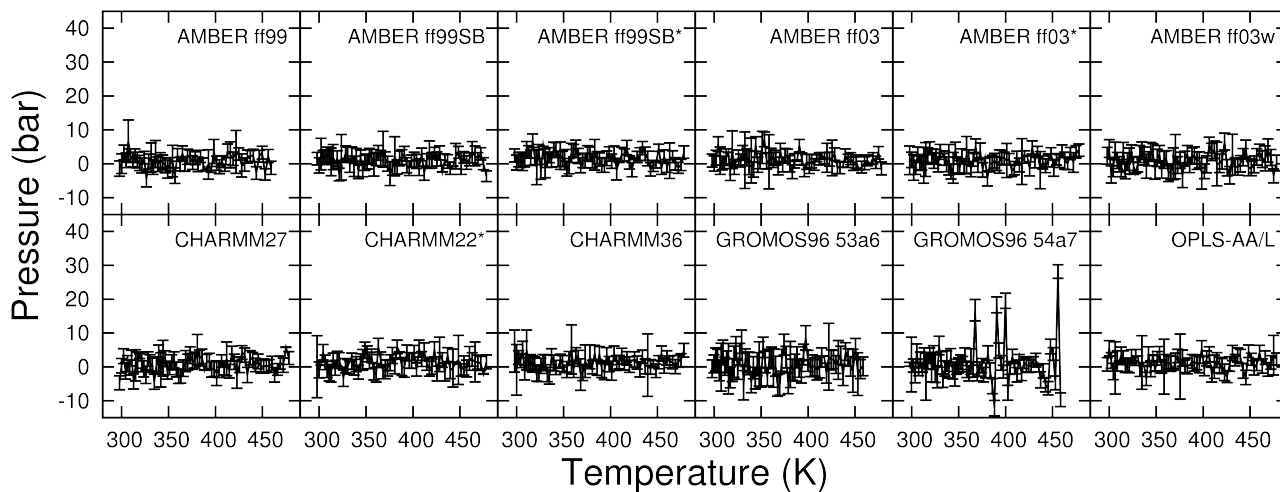

Figure S7: Average pressure of the system as a function of temperature.

## SOLVATION THERMODYNAMICS

| Force field        | Water model      | Propionamide | N-methylamide | Zwitterionic glutamine | Neutral glutamine | Ref. |
|--------------------|------------------|--------------|---------------|------------------------|-------------------|------|
| AMBER ff94 (1)     | TIP3P            | -32.2        |               |                        |                   | (2)  |
| AMBER ff99         | TIP3P            | -42.2        |               |                        |                   | (3)  |
| AMBER ff03         | TIP3P            | -43.9        |               |                        |                   | (4)  |
| CHARMM22 (5)       | TIP3P            | -31.4        |               |                        |                   | (2)  |
| CHARMM22           | TIP3P for CHARMM |              | -49.4         |                        |                   | (6)  |
| GROMOS96 53a6      | SPC              | -42.3        |               |                        |                   | (3)  |
| OPLS-AA (1996) (7) | TIP3P            | -35.1        |               |                        |                   | (2)  |
| OPLS-AA/L          | TIP4P            | -35.5        |               |                        |                   | (8)  |
| OPLS-AA/L          | TIP4P            | -32.9        |               |                        |                   | (3)  |
| OPLS-AA/L          | TIP4P            |              |               | -249.4                 | -79.9             | (9)  |

Table S5: Hydration free energies (in kJ/mol) of propionamide, the analog of the glutamine side chain; N-methylacetamide, an analog of the peptide backbone; zwitterionic glutamine; and neutral (uncharged) glutamine.

## References

- Cornell, W. D., P. Cieplak, C. I. Bayly, I. R. Gould, K. M. Merz, D. M. Ferguson, D. C. Spellmeyer, T. Fox, J. W. Caldwell, and P. A. Kollman, 1995. A Second Generation Force Field for the Simulation of Proteins, Nucleic Acids, and Organic Molecules. *Journal of the American Chemical Society* 117:5179–5197. <http://pubs.acs.org/doi/abs/10.1021/ja00124a002>.
- Shirts, M. R., J. W. Pitera, W. C. Swope, and V. S. Pande, 2003. Extremely precise free energy calculations of amino acid side chain analogs: Comparison of common molecular mechanics force fields for proteins. *Journal of Chemical Physics* 119:5740–5761.
- Hess, B., and N. F. A. van der Vegt, 2006. Hydration thermodynamic properties of amino acid analogues: a systematic comparison of biomolecular force fields and water models. *Journal of Physical Chemistry B* 110:17616–17626.
- Khoury, G. A., N. Bhatia, and C. A. Floudas, 2014. Hydration free energies calculated using the AMBER ff03 charge model for natural and unnatural amino acids and multiple water models. *Computers & Chemical Engineering* 71:745–752.
- MacKerell Jr., A., D. Bashford, M. Bellott, R. Dunbrack Jr., J. Evanseck, M. Field, S. Fischer, J. Gao, H. Guo, S. Ha, D. Joseph-McCarthy, L. Kuchnir, K. Kuczera, F. Lau, C. Mattos, S. Michnick, T. Ngo, D. Nguyen, B. Prodhom, W. Reiher III, B. Roux, M. Schlenkrich, J. Smith, R. Stote, J. Straub, M. Watanabe, J. Wiorkiewicz-Kuczera, D. Yin, and M. Karplus, 1998. All-Atom Empirical Potential for Molecular Modeling and Dynamics Studies of Proteins. *Journal of Physical Chemistry B* 102:3586–3616.
- Nutt, D. R., and J. C. Smith, 2007. Molecular Dynamics Simulations of Proteins: Can the Explicit Water Model Be Varied? *Journal of Chemical Theory and Computation* 3:1550–1560.
- Jorgensen, W. L., D. S. Maxwell, and J. Tirado-Rives, 1996. Development and Testing of the OPLS All-Atom Force Field on Conformational Energetics and Properties of Organic Liquids. *Journal of the American Chemical Society* 118:11225–11236.
- Shirts, M. R., and V. S. Pande, 2005. Solvation free energies of amino acid side chain analogs for common molecular mechanics water models. *Journal of Chemical Physics* 122.
- Chang, J., A. M. Lenhoff, and S. I. Sandler, 2007. Solvation free energy of amino acids and side-chain analogues. *Journal of Physical Chemistry B* 111:2098–2106.
